# Supplementary material for: Facile fabrication of luminescent Tb@HOF-based films as a highly sensitive platform for detecting nicotine and its metabolite cotinine via fluorescence sensing and a smartphone
Source: Royal Society of Chemistry journal article supplement (doi:10.1039/d2ta09681a), 2023-01-01
Supplement: d2ta09681a1.pdf [file d2ta09681a1.pdf]

1 **Facile fabrication of luminescent Tb@HOFs-based films as highly**  
2 **sensitive platform for detecting nicotine and its metabolite cotinine via**  
3 **fluorescence sensing and smartphone**

4 Zhongqian Hu, Bing Yan \*

5 *School of Chemical Science and Engineering, Tongji University, Siping Road 1239, Shanghai 200092,*  
6 *China.*

7

8

9

10

11

12

13

14

15

16

17

18

19

20

21

22

23

24

---

\* Corresponding author: Email address: [byan@tongji.edu.cn](mailto:byan@tongji.edu.cn) (Bing Yan)

## 25 **1. Experimental Section**

### 26 **1.1. Materials**

27 Except for special instructions, all chemicals were commercially available involved in this work  
28 and were used without further purification, which include melamine (MA), benzene-1,3,5-  
29 tricarboxylic acid (TMA), nicotine, cotinine, benzene, toluene, ethylbenzene, xylene,  
30 benzo[a]pyrene, formaldehyde, crotonaldehyde, catechol, ammonia, hydrazinium hydroxide solution,  
31 1,3-butadiene, lead, cadmium, chromium, dichloromethane, NaCl, KCl, NH<sub>4</sub>Cl, CaCl<sub>2</sub>, MgCl<sub>2</sub>,  
32 Na<sub>2</sub>CO<sub>3</sub>, NaH<sub>2</sub>PO<sub>4</sub>, lysozyme, mucin,  $\alpha$ -amylase and agarose. Tb(NO<sub>3</sub>)<sub>3</sub>·6H<sub>2</sub>O was obtained by  
33 dissolving Tb<sub>2</sub>O<sub>3</sub> quantitatively in 37.5% HNO<sub>3</sub> followed by recrystallization. The aqueous solution  
34 with various pH values was prepared by adding different content of HNO<sub>3</sub> and NaOH in deionized  
35 water. Human saliva used in this work was purchased from Chang Feng Technology Co., Ltd  
36 (Dongguan, China) and the human saliva was diluted by 1:10 ratio with deionized water solution for  
37 cotinine test.

### 38 **1.2. Instruments**

39 The powder X-ray diffraction (PXRD) patterns were recorded on Bruker D8 ADVANCE  
40 diffractometer employing Cu K $\alpha$  radiation (40 mA and 40 kV) with a 2 $\theta$  range from 5° to 45° at room  
41 temperature. Scanning electron microscope (SEM) images were performed on a Hitachi S-4800 field  
42 emission scanning electron microscope operating at 3 kV. Energy dispersive X-ray spectroscopy  
43 (EDX) were obtained by the scanning electron microscope operating at 15 kV. Fourier transform  
44 infrared (FT-IR) spectra were obtained by a Nexus 912 AO446 infrared spectrum radiometer in the  
45 wavenumber range of 4000 - 400 cm<sup>-1</sup>. X-ray photoelectron spectroscopy (XPS) spectra were noted  
46 under the ultrahigh vacuum (< 10<sup>-6</sup> Pa) at pass energy (93.90 eV) with Axis Ultra DLD spectrometer  
47 (Kratos, Japan) by employing an Mg K $\alpha$  (1253.6 eV) anode. Inductively coupled plasma-optical

48 emission spectrometer (ICP/OES) was obtained by Agilent ICPOES730. Thermogravimetric (TG)  
49 curves were measured on a TA TGA 55 system operating at a heating rate of 10 °C/min in the range  
50 of 25 °C up to 800 °C under N<sub>2</sub> atmosphere. The fluorescence spectra were obtained on an Edinburgh  
51 FLS920 spectrophotometer employing 450 W xenon lamp as the source of excitation with appropriate  
52 cutoff filter. The Commission International de l'Eclairage (CIE) coordinate were calculated by  
53 CIE1931 chromaticity coordinate calculation according to the fluorescence emission spectra. The  
54 UV-vis absorption spectra were carried on an Agilent 8453 spectrometer. The pH values of aqueous  
55 solutions were determined by an INESA PHS-25 pH meter with an E-201F pH composite electrode,  
56 which was carefully calibrated by standard buffer solution before testing. The HOMO-LUMO orbital  
57 energies were optimized by the B3LYP hybrid density functional and the basis set was 6-31G(d).

### 58 **1.3. Synthesis of MA-TMA**

59 MA-TMA material was synthesized by MA (melamine) and TMA (benzene-1,3,5-tricarboxylic  
60 acid) in deionized water according to the literature with some modification<sup>30</sup>. MA (0.5 mmol, 0.0631  
61 g) and TMA (0.5 mmol, 0.1051 g) were respectively dissolved in deionized water (50 mL), which  
62 was heated at 80 °C with stirring until completely dissolved. Then, the solutions of MA and TMA  
63 were mixed and stirred for 1 h at room temperature. The crude product was collected by centrifuged  
64 and washed with deionized water three times. Finally, the pure white powder was dried on a vacuum  
65 oven at 50 °C for 12 h, which was named as MA-TMA.

66

67

68

69

70

71

## 72 2. Supporting Figures and Tables

73

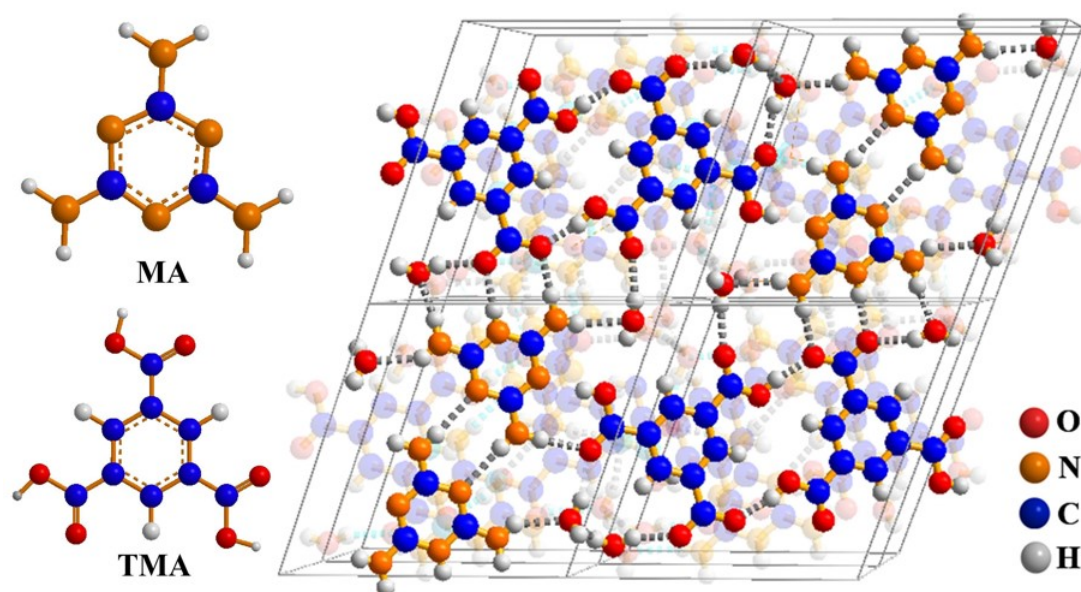

74 **Fig. S1.** The structure of MA, TMA and MA-TMA.

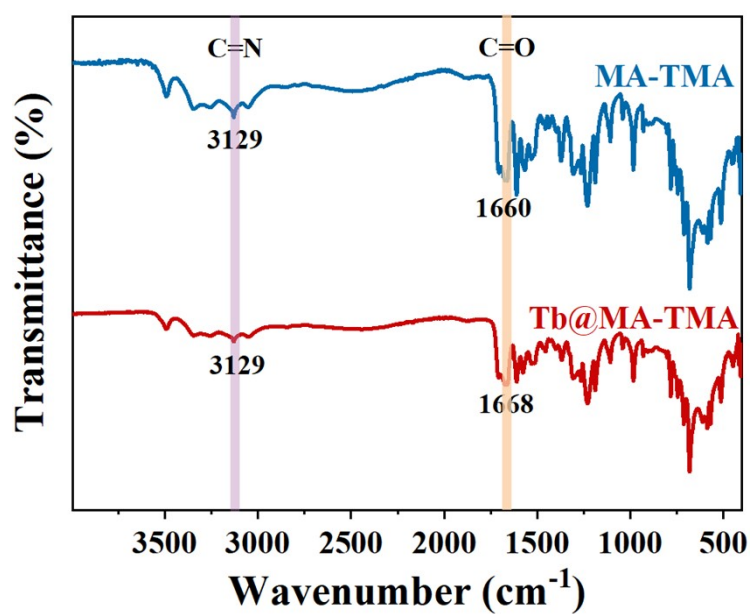

75

76 **Fig. S2.** FT-IR spectra of MA-TMA and Tb@MA-TMA.

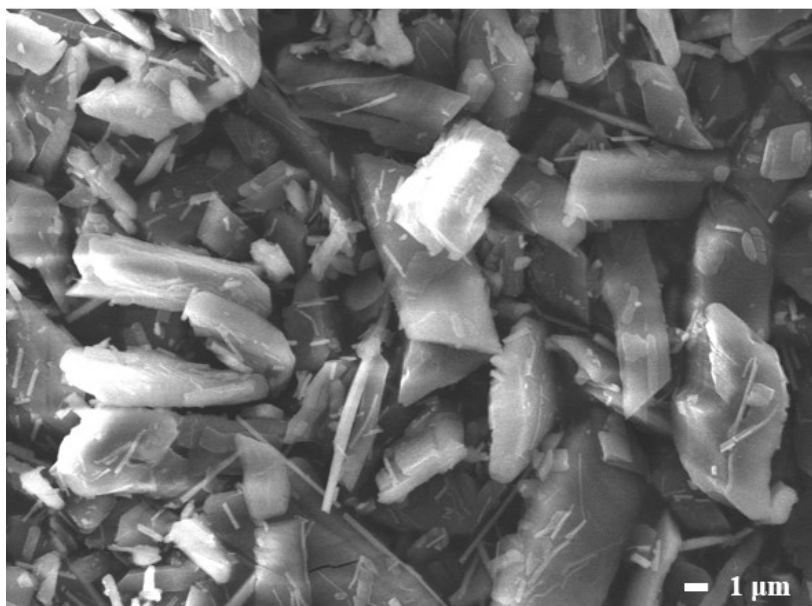

78 **Fig. S3.** SEM images of MA-TMA.

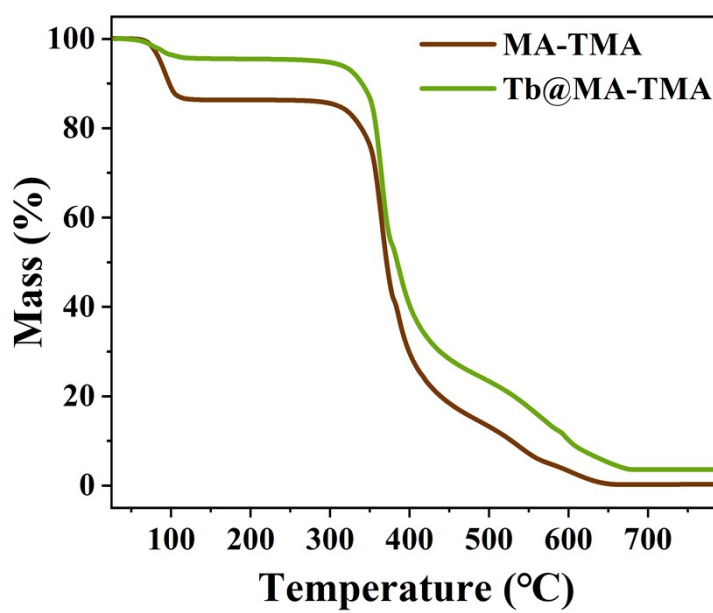

80 **Fig. S4.** TG curves of MA-TMA and Tb@MA-TMA.

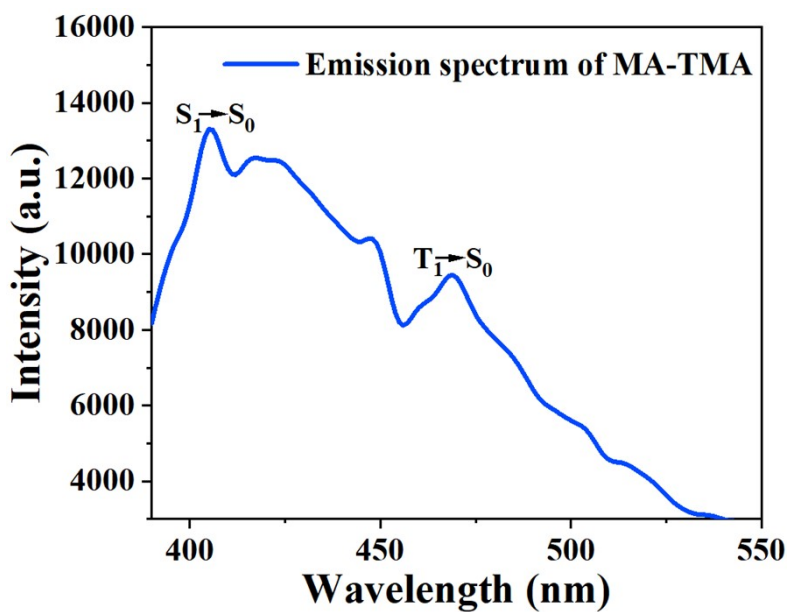

81

82 **Fig. S5.** Emission spectrum of MA-TMA ( $\lambda_{\text{ex}} = 302$  nm).

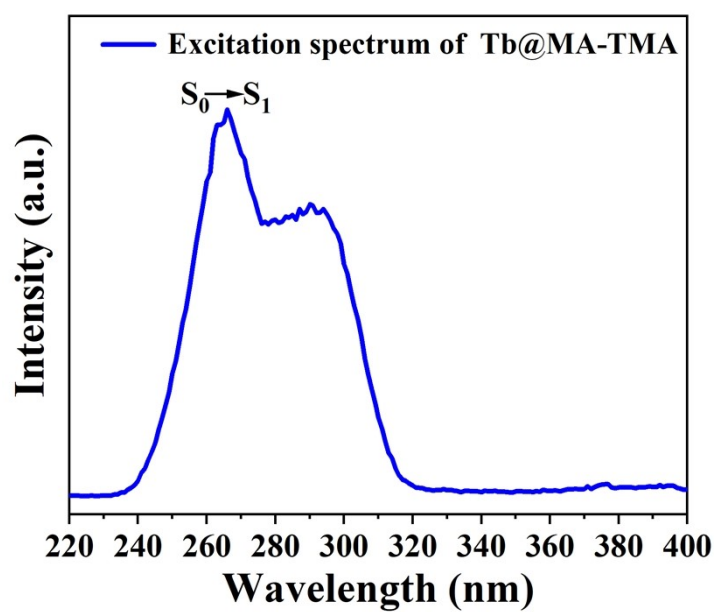

83

84 **Fig. S6.** Excitation spectra of Tb@MA-TMA, 1 and 2 ( $\lambda_{\text{em}} = 544$  nm).

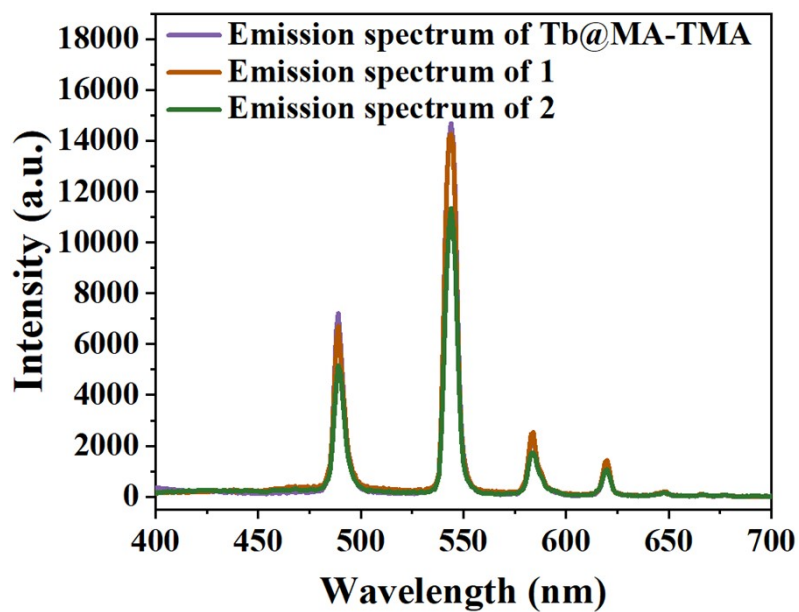

85

86 **Fig. S7.** Emission spectra of Tb@MA-TMA, 1 and 2 ( $\lambda_{\text{ex}} = 268$  nm).

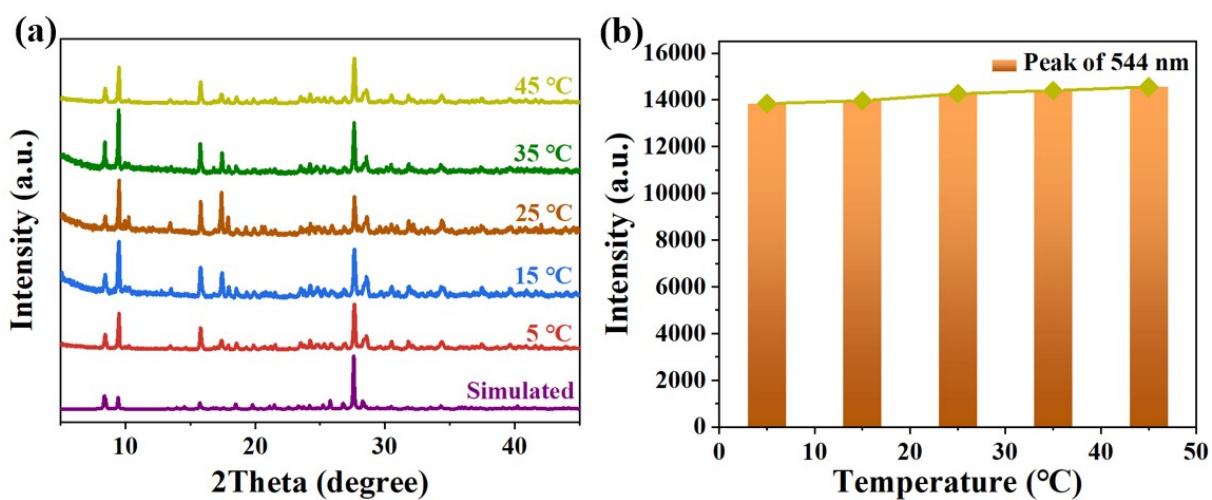

87

88 **Fig. S8.** (a, b) PXRD patterns and emission intensity of 1 at 544 nm in different temperatures after

89 48 h.

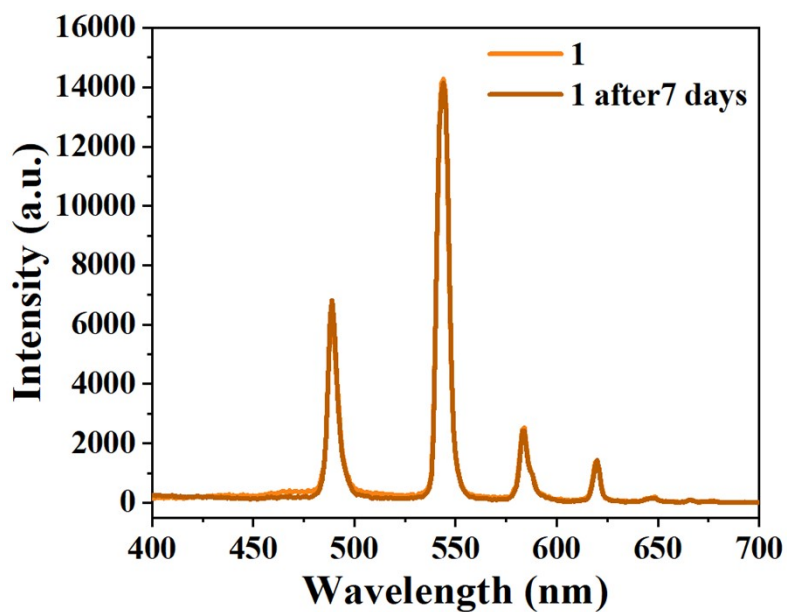

90

91 **Fig. S9.** Emission spectra of **1** before and after 7 days in the air at room temperature ( $\lambda_{\text{ex}} = 268$  nm).

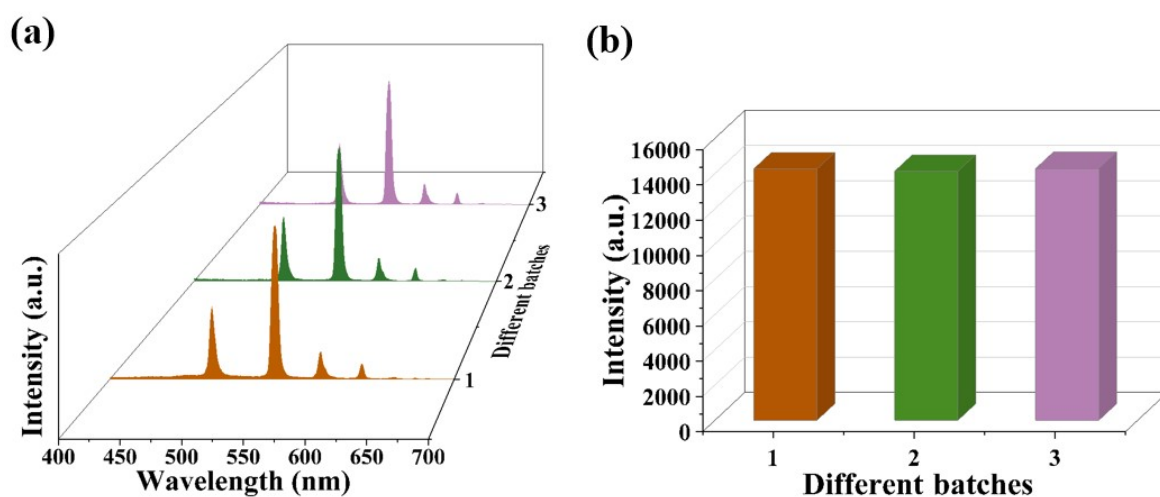

92

93 **Fig. S10.** (a, b) Emission spectra and emission intensity at 544 nm of **1** at different batches ( $\lambda_{\text{ex}} = 268$

94 nm).



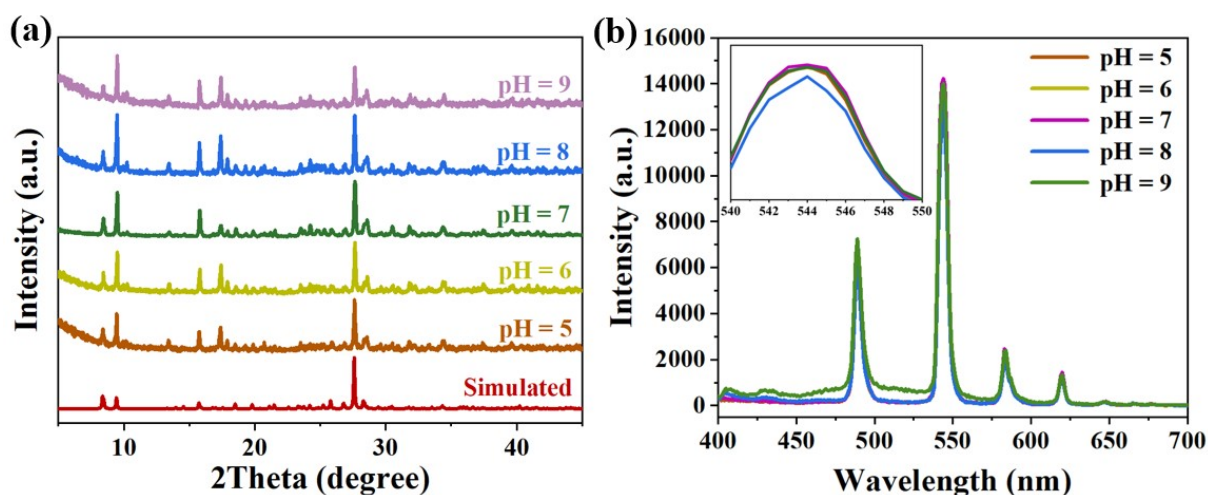

95  
 96 **Fig. S11.** (a, b) PXRD patterns and emission spectra of **2** in pH range of 5 – 9 ( $\lambda_{\text{ex}} = 268 \text{ nm}$ ).

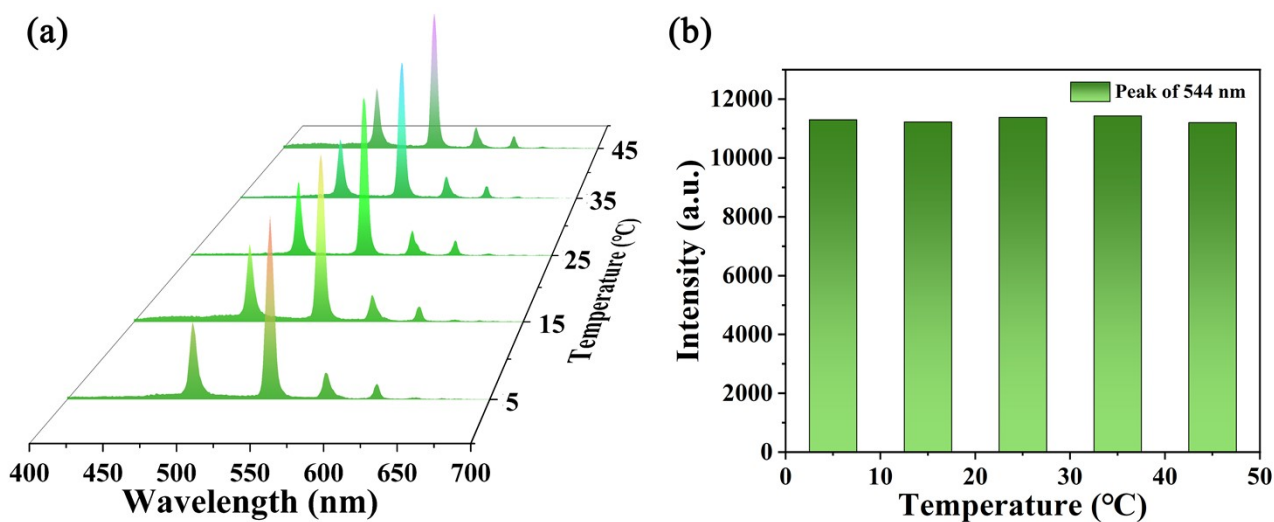

97  
 98 **Fig. 12.** (a, b) Emission spectra and emission intensity at 544 nm of **2** at different temperatures after  
 99 48 h. ( $\lambda_{\text{ex}} = 268 \text{ nm}$ ).

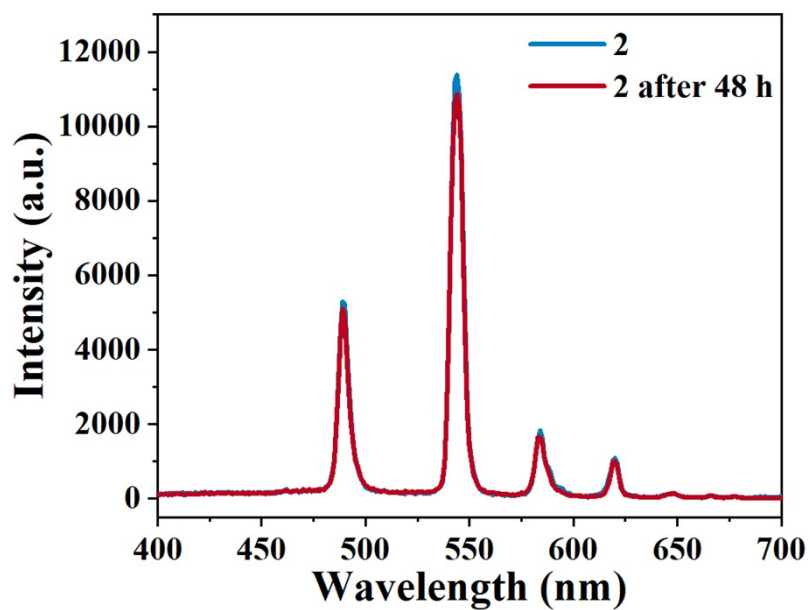

100

101 **Fig. S13.** Emission spectra of **2** before and after 48 h in aqueous solution at room temperature ( $\lambda_{\text{ex}} =$   
 102 268 nm).

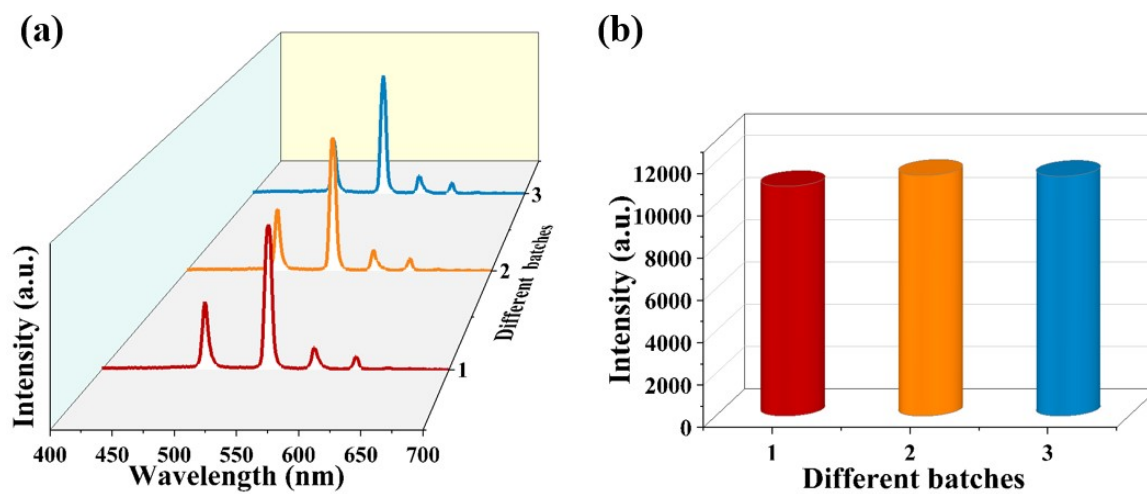

103

104 **Fig. S14.** (a, b) Emission spectra and emission intensity at 544 nm of **2** at different batches ( $\lambda_{\text{ex}} = 268$   
 105 nm).

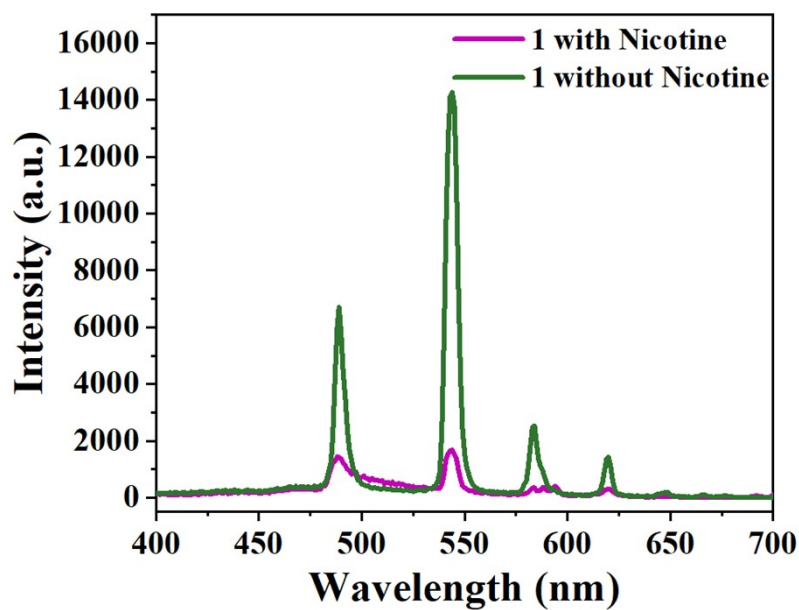

106

107 **Fig. S15.** Emission spectra of **1** with and without nicotine ( $\lambda_{\text{ex}} = 268$  nm).

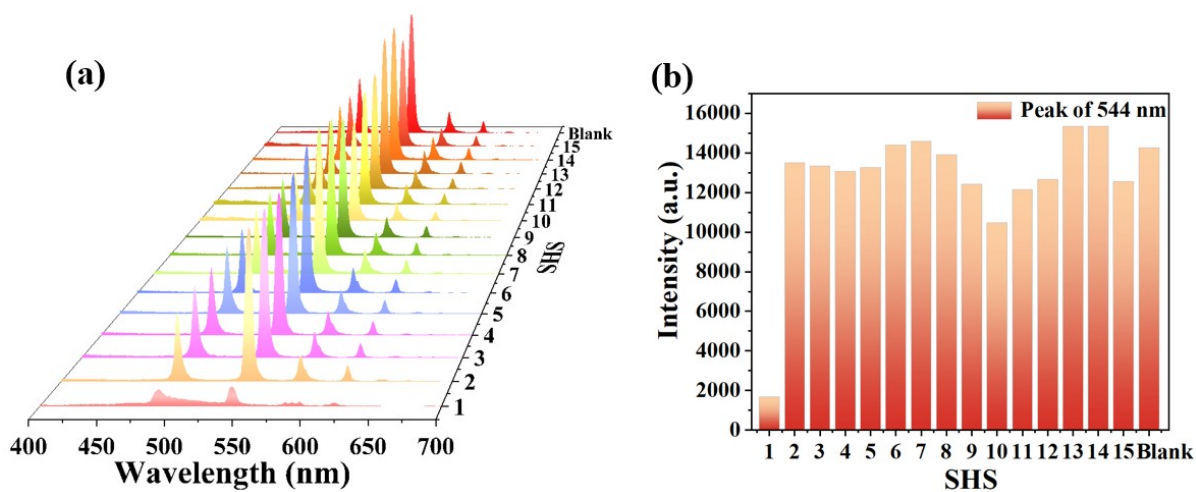

108

109 **Fig. S16.** (a, b) Emission spectra and emission intensity at 544 nm of **1** exposed in different gas

110 atmospheres of SHS ( $\lambda_{\text{ex}} = 268$  nm).

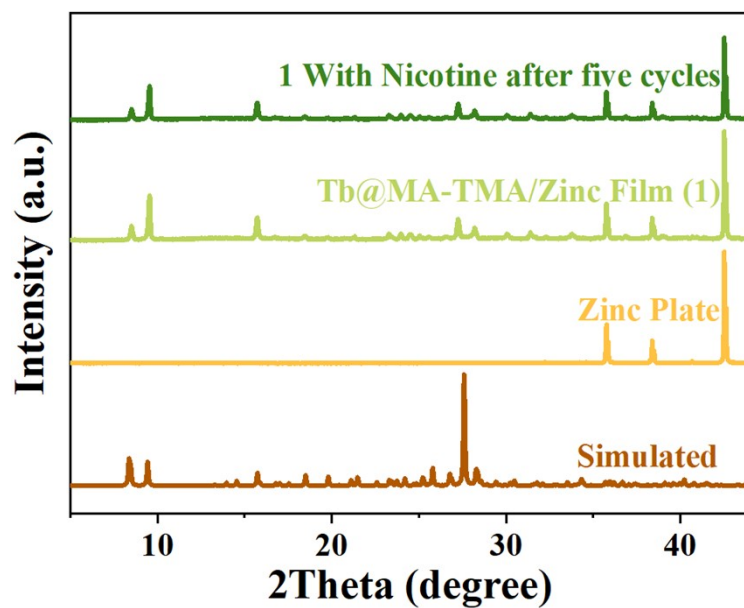

111

112 **Fig. S17.** PXRD patterns of Zinc Plate, Tb@MA-TMA/Zinc Film (1) and 1 with nicotine after five  
 113 cycles.

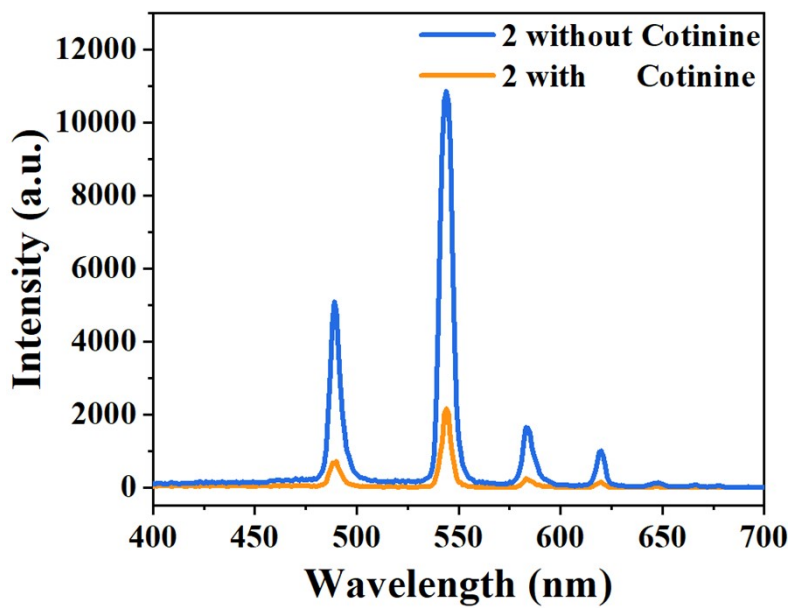

114

115 **Fig. S18.** Emission spectra of 2 with and without cotinine ( $\lambda_{\text{ex}} = 268 \text{ nm}$ ).

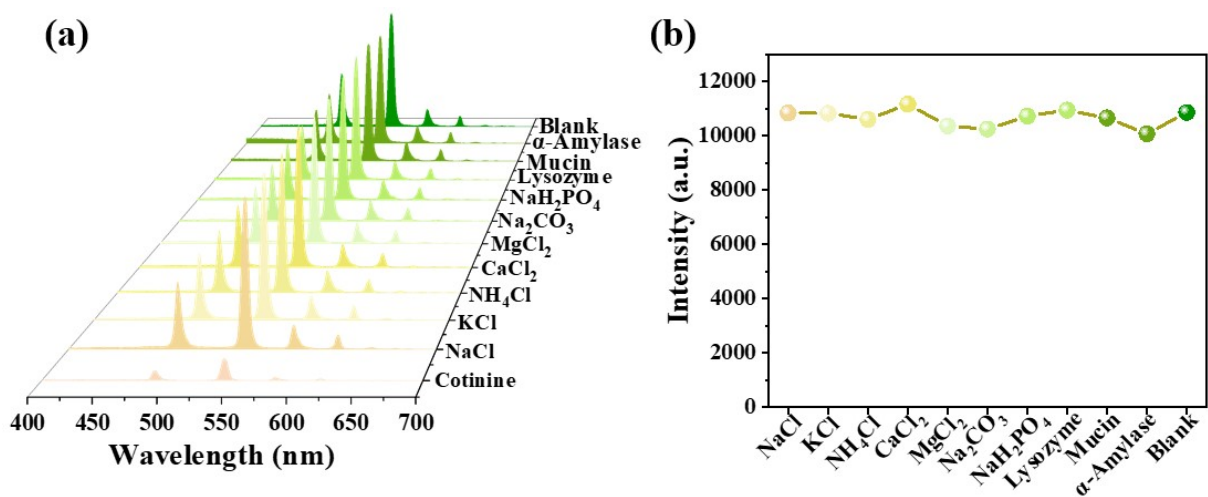

116

117 **Fig. S19.** (a, b) Emission spectra and emission intensity at 544 nm of **2** in various components of  
 118 saliva ( $\lambda_{\text{ex}} = 268$  nm).

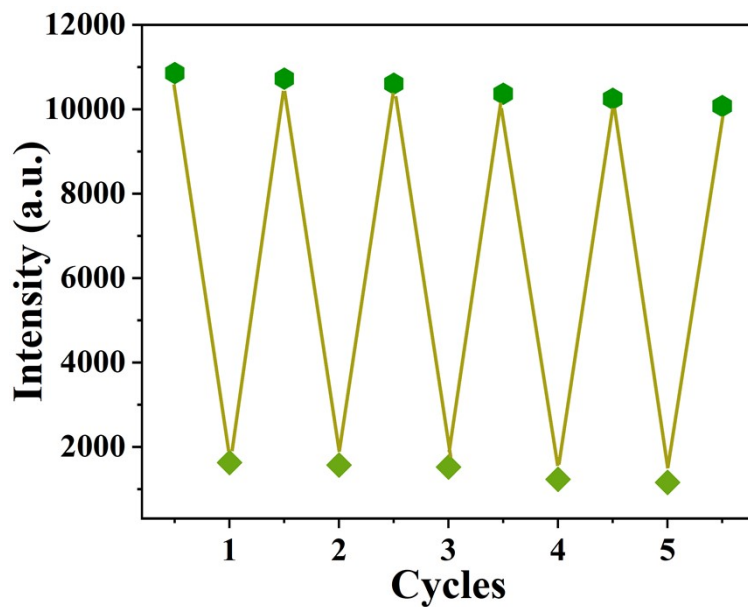

119

120 **Fig. S20.** Emission intensity of **2** at 544 nm in five cycles for cotinine in aqueous solution ( $\lambda_{\text{ex}} = 268$   
 121 nm).

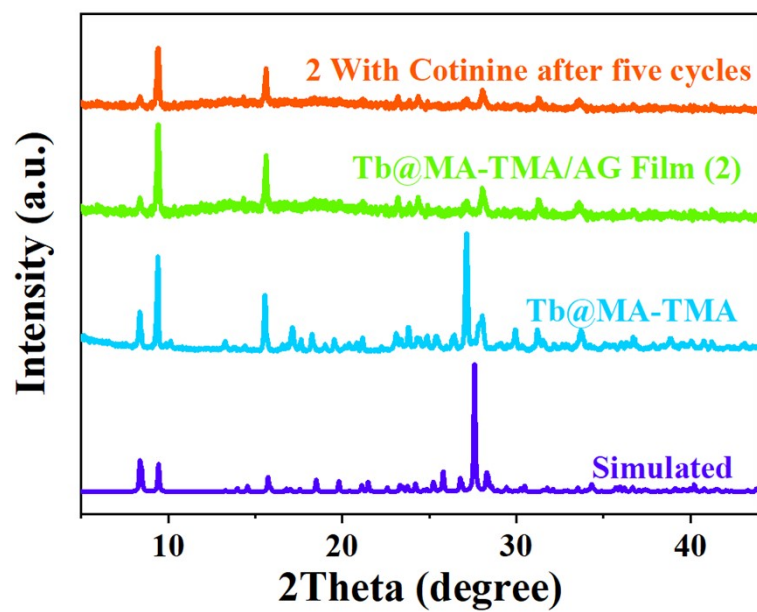

122

123 **Fig. S21.** PXRD patterns of Tb@MA-TMA/AG Film (2) and 2 with cotinine after five cycles.

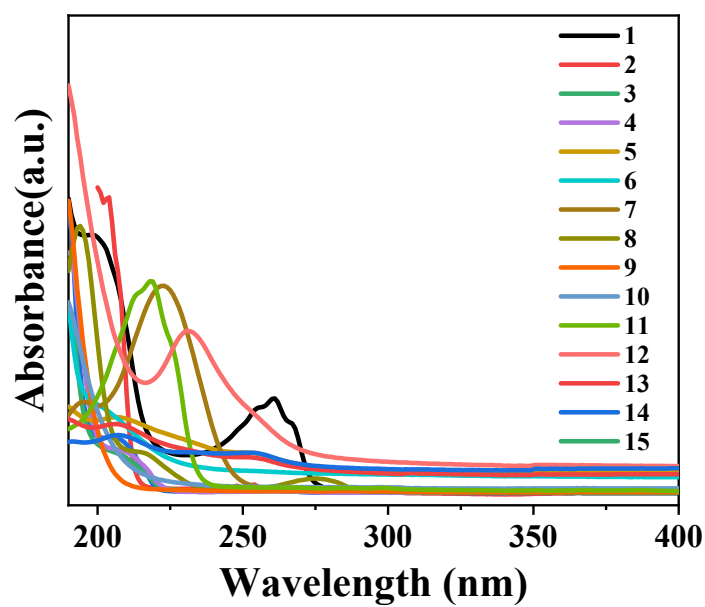

124

125 **Fig. S22.** UV absorption spectra of nicotine and other 14 components of SHS.

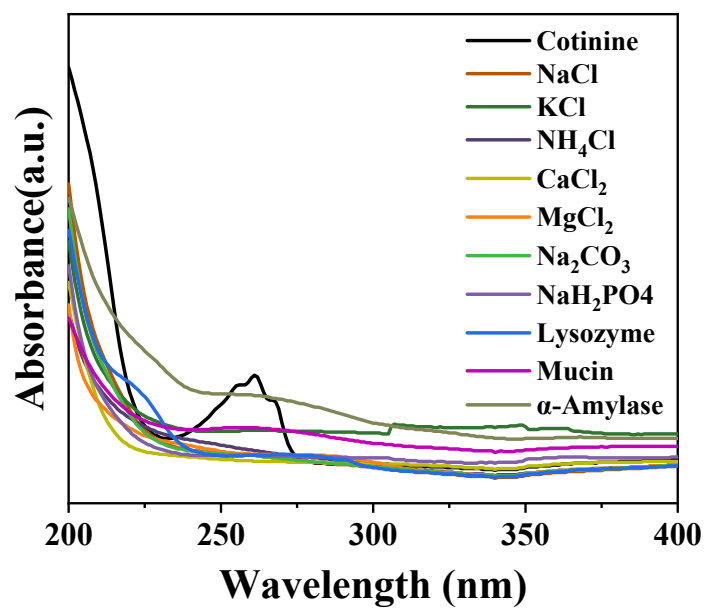

126

127 **Fig. S23.** UV absorption spectra of cotinine and other chemicals in saliva.

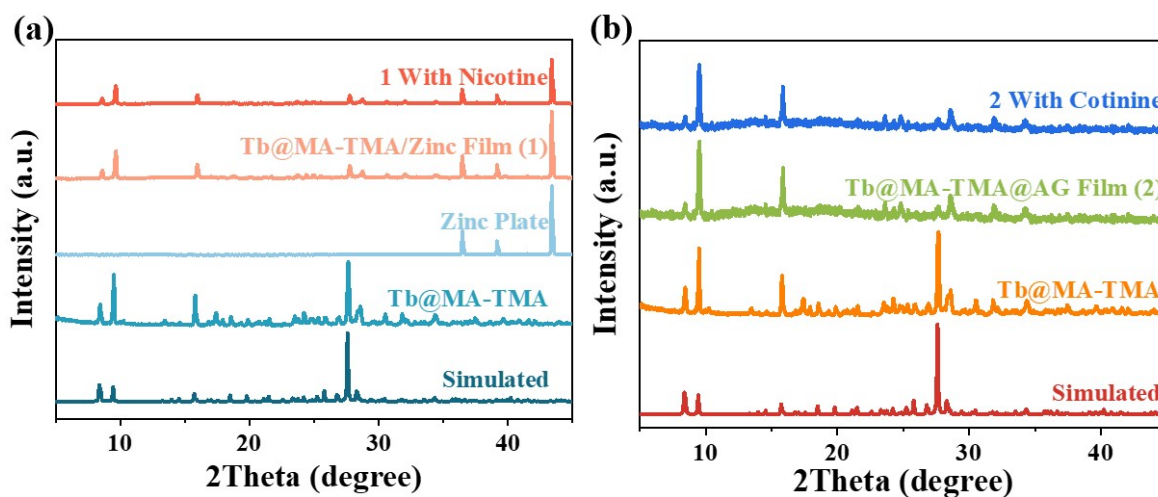

128

129 **Fig. S24.** (a) PXR D patterns of Tb@MA-TMA/Zinc Film (1) and 1 with nicotine. (b) PXR D patterns

130 of Tb@MA-TMA/AG Film (2) and 2 with cotinine.



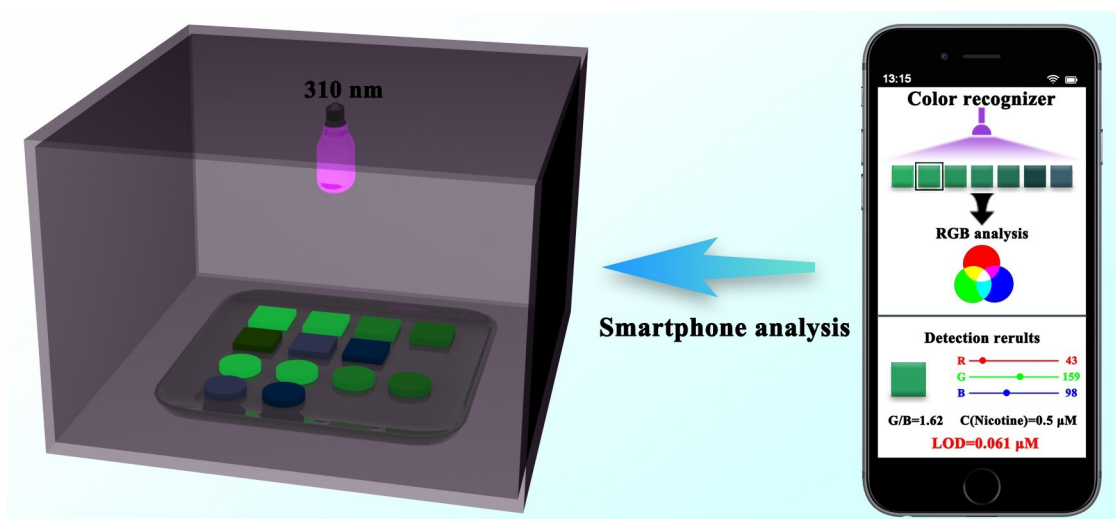

131

132 **Fig. S25.** The 3D views of homemade sensor platform with smartphone.

133 **Table S1.** ICP analysis of Tb element.

| Sample    | $m_0$ (g) | $V_0$ (mL) | Test elements | $C_0$ (mg/L) | f  | $C_x$ (mg/kg) | W (%) |
|-----------|-----------|------------|---------------|--------------|----|---------------|-------|
| Tb@MA-TMA | 0.0433    | 25         | Tb            | 5.97664      | 10 | 34507.16      | 3.45  |

134 In Table S1,  $m_0$ ,  $V_0$ ,  $C_0$ , f,  $C_x$  and W is sample mass, constant volume, concentration of elements in  
 135 the test solution, dilution multiple, sample element content and mass content of test element.

136 **Table S2.** Summary of emission transitions and experimental energy gaps of MA-TMA and Tb<sup>3+</sup>  
 137 ions.

|                  | Transitions               | Wavelength (nm) | Energy gap (eV) |
|------------------|---------------------------|-----------------|-----------------|
| MA-TMA           | $S_1 \rightarrow S_0$     | 405             | 3.06            |
|                  | $T_1 \rightarrow S_0$     | 469             | 2.64            |
|                  | $^5D_4 \rightarrow ^7F_6$ | 489             | 2.54            |
| Tb <sup>3+</sup> | $^5D_4 \rightarrow ^7F_5$ | 544             | 2.28            |
|                  | $^5D_4 \rightarrow ^7F_4$ | 584             | 2.12            |



---

 ${}^5D_4 \rightarrow {}^7F_3$ 

---

620

2.00

---

138 Energy =  $1240/\lambda$  (eV)139 **Table S3.** Physical and chemical parameters of SHS.

---

| Analytes                            | $\rho$ (g/cm <sup>3</sup> ), 20 °C | M (g/mol) |
|-------------------------------------|------------------------------------|-----------|
| nicotine (1)                        | 1.01                               | 162.23    |
| benzene (2)                         | 0.879                              | 78.11     |
| toluene (3)                         | 0.879                              | 78.11     |
| ethylbenzene (4)                    | 0.867                              | 106.17    |
| xylene (5)                          | 0.86                               | 106.17    |
| benzo[a]pyrene (6)                  | 1.286                              | 252.31    |
| formaldehyde (7)                    | 0.815                              | 30.03     |
| crotonaldehyde (8)                  | 0.853                              | 70.09     |
| catechol (9)                        | 0.867                              | 1.371     |
| ammonia (10)                        | 0.91                               | 17.03     |
| hydrazinium hydroxide solution (11) | 1.032                              | 32.05     |
| 1,3-butadiene (12)                  | 0.62                               | 54.09     |
| lead (13)                           | 11.34                              | 207.20    |
| cadmium (14)                        | 8.65                               | 112.41    |
| chromium (15)                       | 7.19                               | 52.00     |

---

140 **Table S4.** HOMO and LUMO orbital energies calculated at B3LYP/6-31G\* level.

|                                  | HOMO (eV) | LUMO (eV) | Band Gap (eV) |
|----------------------------------|-----------|-----------|---------------|
| benzene-1,3,5-tricarboxylic acid | -7.859    | -2.186    | 5.673         |
| melamine                         | -6.518    | 0.248     | 6.766         |
| nicotine                         | -0.209    | -0.027    | 0.182         |
| cotinine                         | -0.243    | -0.032    | 0.211         |

141 **Table S5.** The results of recovery experiments by smartphone (n = 3).

| Samples  | No. | Spiked ( $\mu\text{M}$ ) | Found ( $\mu\text{M}$ ) | Recovery (%) | RSD (%) |
|----------|-----|--------------------------|-------------------------|--------------|---------|
| nicotine | 1   | 1                        | 1.02                    | 102          | 2.53    |
|          | 2   | 10                       | 9.56                    | 95.60        | 2.87    |
|          | 3   | 100                      | 97.72                   | 97.72        | 3.86    |
| cotinine | 1   | 10                       | 9.51                    | 95.10        | 2.95    |
|          | 2   | 100                      | 96.12                   | 96.12        | 2.65    |
|          | 3   | 1000                     | 988.76                  | 98.88        | 2.31    |

142 30 X. L. Zhang and X. M. Chen, Cryst. Growth. Des., 2005, 5, 617 – 622.
